# Supplementary material
Source: PubMed Central journal article supplement (PMC7240808)
Supplement: NIHMS1588453-supplement-Supp1.pdf [file NIHMS1588453-supplement-Supp1.pdf]

1 **SUPPORTING INFORMATION:**  
2 **Perfluorinated Alkyl Acids in Hawaiian**  
3 **Cetaceans and Potential Biomarkers of**  
4 **Effect: Peroxisome Proliferator-Activated**  
5 **Receptor Alpha and Cytochrome P450 4A**

6 *ADAM E. KURTZ*<sup>†,‡</sup> *JESSICA L. REINER*<sup>§,⊥</sup> *KRISTI L. WEST*<sup>†,||</sup> and *BRENDA A.*  
7 *JENSEN*<sup>†, \*</sup>

8 <sup>†</sup> Hawai‘i Pacific University, College of Natural and Computational Sciences, 45-045  
9 Kamehameha Hwy., Kaneohe, HI 96744

10 <sup>§</sup> National Institute of Standards and Technology, 100 Bureau Dr., Gaithersburg, MD  
11 20899

12

13 **ADDITIONAL MATERIALS AND METHODS**

14 **Quantification of PFAAs.** A linear regression of the calibration curve (without  
15 forcing the intercept through zero) was used to calculate the concentrations of PFAAs in  
16 the samples and SRMs. Each PFAA was quantified utilizing a relative response ratio to

17 the internal standard most similar in structure. The limits of detection (LOD) were  
18 calculated as the maximum value of either 1.) the average mass of each PFAA (ng)  
19 measured in the sample plus 3 standard deviations of the blanks or 2.) the lowest calibrant  
20 detectable, all divided by the mass (g) of the sample. All concentrations include both  
21 linear and branched isomers.

22 The calibration curves for the PFAA calibrants had  $R^2 \geq 0.99$ . In addition, PFOS  
23 concentrations measured in SRM 1947 samples demonstrated reproducible results when  
24 compared to values listed in the CoA. Both SRM replicates, identified as SRM 1947-1  
25 and SRM 1947-2, were prepared in conjunction with liver samples and the SRM  
26 replicates SRM 1947-3 and SRM1947-4 were prepared in conjunction with kidney  
27 samples. PFOS values determined in the SRM 1947 replicates were similar to the values  
28 provided on the CoA (Table S2).

29 ***mRNA Quantification.*** Reverse transcription was performed by heating 11  $\mu$ L of  
30 the purified RNA and 3  $\mu$ L of random primers at 70°C for 5 minutes. M-MLV Reverse  
31 Transcriptase and dNTPs were added to the sample and the solution incubated for 65  
32 minutes at 37°C. Random primers, reverse transcriptase, and dNTPs were purchased from  
33 Promega®.

34 A consensus sequence of four mammal species for each gene was created to  
35 design primers for a segment of the cetacean gene. Complete coding DNA sequences for  
36 PPAR $\alpha$  and CYP4A from GenBank were aligned using MacVector to create a consensus  
37 sequence for each gene [PPAR $\alpha$ : human (accession # L02932), cow (accession #  
38 BT020756, mouse (accession # AK035676), rat (accession # M88592); CYP4A: dog  
39 (accession # DQ138950), human (accession # L04751), pig (accession # AF384031), rat

40 (accession # M33936)]. Primer pairs were designed in conserved regions of these  
41 sequences for amplicons of ~702 (PPAR $\alpha$ ) and ~423 (CYP4A) base pairs. The product of  
42 the cetacean primers (i.e. a segment of the cetacean gene sequence) was used to design  
43 qPCR primers for the samples (Table S3). Primer pairs for qPCR were developed from  
44 these cetacean sequences for amplicons of 194 (PPAR $\alpha$ ) and 190 (CYP4A) base pairs.

45 Primer pairs were validated with cetacean samples using traditional PCR and  
46 sequencing of the PCR product. The PCR cocktail consisted of 0.5  $\mu$ L cDNA, 0.25  $\mu$ L of  
47 both forward and reverse primers, 11.5  $\mu$ L of nuclease-free water, and 12.5  $\mu$ L of  
48 GoTaq<sup>®</sup> Hot Start Green Master Mix from Promega<sup>®</sup>. The PCR machine used was the  
49 Mastercycler<sup>®</sup> pro by Eppendorf. The reaction procedure was an initial hold of 95°C for 3  
50 minutes, a three-step cycle repeated 40 times of 95°C for 15 seconds, a temperature  
51 gradient ranging from 52°C to 60°C for 30 seconds, and 72°C for 30 seconds. This was  
52 followed by an extended annealing step after the last cycle of 72°C for 1 minute. The  
53 product was loaded into a gel (1% agarose and 0.5 $\mu$ g/ml ethidium bromide in 2.5% 40X  
54 TAE buffer) and separated using gel electrophoresis at ~100 V for ~1 hour. The gel was  
55 viewed under ultraviolet light and appropriate bands were removed. The cDNA in the  
56 bands were purified using the Wizard<sup>®</sup> SV Gel and PCR Clean-Up System from  
57 Promega<sup>®</sup> and 5  $\mu$ L were combined with 1  $\mu$ L of each forward and reverse primer in  
58 separate tubes. These samples were sequenced and the output was uploaded into  
59 MacVector with Assembler and validated by known sequences through a BLAST search  
60 in GenBank.

61 Real-time PCR (qPCR) was performed on the Eppendorf Mastercycler<sup>®</sup> ep  
62 *realplex*. The qPCR cocktail consisted 1  $\mu$ L of cDNA, 0.25  $\mu$ L of forward and reverse

63 primers, 3.5  $\mu$ L of nuclease-free water, and 5  $\mu$ L GoTaq<sup>®</sup> qPCR Master Mix from  
64 Promega<sup>®</sup>. The reaction consisted of an initial hold at 95°C for 3 minutes and a two-step  
65 cycle repeated 40 times of 1.) 95°C for 15 seconds and 2.) 55°C for 45 seconds. After the  
66 last reaction cycle, a melt curve was generated at 95°C for 15 seconds, 55°C for 15  
67 seconds, and a ramp back up to 95°C over 20 minutes. All samples were run in triplicate.  
68 Relative concentrations were calculated using the  $\Delta\Delta C_q$  method.

$$69 \quad \Delta C_q (sample) = C_q (sample) - C_q (reference\ gene)$$

$$70 \quad \Delta\Delta C_q (sample) = \Delta C_q (sample) - \Delta C_q (baseline)$$

71 Fold change was calculated by the transformation:

$$72 \quad \text{fold change} = 2^{-\Delta\Delta C_q (sample)}$$

73 Since the  $\Delta\Delta C_q$  value is a negative number and represents a negative relationship (i.e.  
74 values that are more negative indicate higher mRNA expression), statistical analyses was  
75 performed using the  $-\Delta\Delta C_q$  to represent a positive relationship.

76 **Protein Quantification.** After electrophoresis, the gel was incubated in cold  
77 BupH<sup>™</sup> Tris-Glycine transfer buffer from Thermo Fisher Scientific with 20% methanol  
78 for 15 minutes prior to transfer to a Whatman Westran<sup>™</sup> Polyvinylidene Fluoride (PVDF)  
79 membrane (Sigma-Aldrich<sup>®</sup>, St. Louis, MO) pre-wetted in methanol (30 seconds) and  
80 cold transfer buffer (5 minutes). The transfer module was appropriately constructed,  
81 filled with cold transfer buffer, and placed in the miniVE tank filled with cold water. The  
82 module ran at a constant voltage of 60 V for 2 hours.

83 After the transfer was complete, the membrane was washed in a blocking solution  
84 of Tris-buffered saline and 0.1% Tween (TBST) and 5% non-fat milk for 1 hour on an  
85 orbital shaker. Blocking, antibody probing, and washing were performed on a SNAP i.d.<sup>®</sup>

86 2.0 Protein Detection System from EMD Millipore (Billerica, MA). Antibody probing  
87 used dilutions in TBST of 1:750 of CYP4A primary antibody (catalogue # ab1280 rabbit  
88 anti-rat cytochrome P450 CYP 4A1/2/3 polyclonal antibody from EMD Millipore),  
89 1:1667 of mouse monoclonal alpha tubulin primary antibody from Novus Biologicals  
90 (Littleton, CO), and 1:500 of secondary antibody (stabilized goat anti-rabbit [CYP4A]  
91 and goat anti-mouse [alpha tubulin] IgG peroxidase conjugated from Thermo Fisher  
92 Scientific). Primary antibody probing included an extended incubation time of 30 minutes  
93 on an orbital shaker. Four 30 mL washes of TBST were performed after primary and  
94 secondary antibody probes.

95 Chemiluminescent visualization and band density quantification were performed  
96 using WesternSure™ Premium Substrate, a C-DiGit Blot Scanner, and Image Studio  
97 software (version 4.0.21) from LI-COR, Inc. (Lincoln, NE). The manufacturer  
98 recommendation was utilized for background subtraction (median pixel, border width of  
99 three pixels, right/left segments).

100 **Quality Control.** Application of molecular biology methods to stranded cetacean  
101 tissues often requires a higher than desired tolerance of mRNA and protein degradation.  
102 Nonetheless, quality control measurements were applied and adhered to as much as was  
103 feasible. For qPCR analysis, melt curves and  $C_q$  values were assessed to determine  
104 whether the sample was satisfactory for analysis. A satisfactory melt curve had a single  
105 peak above the threshold in specific expected temperature ranges (i.e. 80.0°C – 82.0°C  
106 and 85°C – 86.5°C for PPAR $\alpha$ , 79.5°C – 82.0°C and 86.0°C – 87.5°C for CYP4A, 81.0°C  
107 – 83.5°C for YWHAZ). Consistent melt curves and  $C_q$  values with a standard deviation

108 <2.00 for at least two of the three triplicates must occur for a sample to be considered  
109 satisfactory.

110 Prior to quantifying target genes, candidates for reference genes were thoroughly  
111 investigated. Previous studies used multiple software programs to examine reference  
112 gene candidates expressed in cetacean skin biopsies.<sup>1,2</sup> The highest ranked reference  
113 genes for reliability and consistency included  $\beta$ -Actin (Act-B), glyceraldehyde 3-  
114 phosphate dehydrogenase (GAPDH), succinate dehydrogenase complex, subunit A,  
115 flavoprotein (SDHA), and tyrosine 3-monooxygenase/tryptophan 5-monooxygenase  
116 activation protein, zeta polypeptide (YWHAZ). Because there were no studies comparing  
117 expression of these reference genes in cetacean liver or kidney cells, pilot experiments  
118 were performed using cetacean liver and kidney samples from this study.

119 Expression of the reference genes was quantified in 38 liver and kidney samples  
120 from 14 cetaceans using qPCR. Three factors were considered when assessing reference  
121 gene candidates. First, expression of the reference gene should be as consistent as  
122 possible across tissues that may reflect different degradation levels. Next, correlation  
123 tests examining the relationship between mRNA expression and RNA quality evaluated  
124 the consistency of the reference gene across samples. To test this, RNA was separated  
125 using gel electrophoresis and RNA quality was scored 1 (low quality) through 5 (high  
126 quality) on an ordinal scale. RNA from fresh HEK cells was used as a standard for a high  
127 quality control. Lastly, melting curve profiles from the qPCR analysis assessed the  
128 reliability of the reference gene during the amplification reaction. Consistent melting  
129 curves are necessary to ensure the reaction performed appropriately for all of the samples.

130 The reference gene analysis suggested that YWHAZ, GAPDH, and Act-B were  
131 viable candidates for reference genes in stranded cetacean livers and kidneys. SDHA was  
132 not considered an appropriate reference gene for these samples. GAPDH had the highest  
133 mean mRNA expression (i.e. lowest mean  $C_q$  value,  $C_q = 22.29$ ), followed by YWHAZ  
134 ( $C_q = 23.80$ ), and Act-B ( $C_q = 26.41$ ). GAPDH also had the most significant correlation  
135 ( $\alpha = 0.10$ ) between mRNA expression and RNA quality ( $R^2 = 0.179$ ,  $p = 0.018$ ), followed  
136 by YWHAZ ( $R^2 = 0.107$ ,  $p = 0.063$ ), and Act-B ( $R^2 = 0.151$ ,  $p = 0.068$ ). YWHAZ  
137 produced the most satisfactory melting curves (33 of 38), followed by GAPDH (31 of  
138 38), and Act-B (23 of 38). Also, YWHAZ had the most consistent melting curve profile,  
139 whereas profiles for both GAPDH and Act-B were much more variable. YWHAZ was  
140 the most appropriate reference gene candidate for this study because of its high mRNA  
141 expression, strong correlation between mRNA expression and quality, and consistent and  
142 reliable melting curve profiles. However, it is important to note that reference genes may  
143 perform differently under different annealing temperature restrictions set by the target  
144 genes.

145 In western blot analyses, each blot was stripped with ReBlot Plus Strong  
146 Stripping Solution 10X (Millipore) and probed for alpha tubulin in order to discern  
147 between low expression and substantial protein degradation. There were also three  
148 internal standards in each blot (50  $\mu\text{g}$  of positive control, 5  $\mu\text{g}$  of positive control, and 50  
149  $\mu\text{g}$  of NIST SRM QC03LH3 pygmy sperm whale liver homogenate). These standards  
150 were used to determine the efficiency of each blot relative to the standard curve blot, and  
151 sample concentrations were corrected accordingly.

152  
153

References

154

155 (1) Spinsanti, G., Panti, C., Lazzeri, E., Marsili, L., Casini, S., Frati, F., & Fossi, C. M.  
156 Selection of reference genes for quantitative RT-PCR studies in striped dolphin (*Stenella*  
157 *coeruleoalba*) skin biopsies. *BMC Molecular Biology*. **2006**, 7 (1), 32.

158 (2) Spinsanti, G., Panti, C., Bucalossi, D., Marsili, L., Casini, S., Frati, F., & Fossi, C. M.  
159 Selection of reliable reference genes for qRT-PCR studies on cetacean fibroblast cultures  
160 exposed to OCs, PBDEs, and 17 $\beta$ -estradiol. *Aquatic Toxicology*. **2008**, 87 (3), 178-186.

161



## Supporting Information – Tables

**Table S1. Animal Information for PFAA Measurement Samples.** *Animal ID* denotes storage identification numbers. *Stranding Date* is the date of the animal stranding, the actual necropsy date may be different. *Stranding Day Number (Str. Day)* corresponds with *Stranding Date*, with day 1 = 01/01/1997, day 2 = 01/02/1997, etc. Abbreviations are utilized for *Common Name* (*W.* = Whale), *Sex* (*F* = female, *M* = male) and *Age Class* (*A* = adult, *J* = Juvenile, *C* = calf).

| Animal ID | Species                 | Common Name            | Family          | Stranding Date | Str. Day | Stranding Location  | Sex | Age Class |
|-----------|-------------------------|------------------------|-----------------|----------------|----------|---------------------|-----|-----------|
| 12470-001 | <i>S. coeruleoalba</i>  | Striped Dolphin        | Delphinidae     | 1/2/1997       | 2        | Mokuleia, Oahu      | M   | A         |
| 15028-001 | <i>S. longirostris</i>  | Spinner Dolphin        | Delphinidae     | 8/29/1997      | 241      | Kailua, Oahu        | M   | C         |
| 15063-001 | <i>M. novaeangliae</i>  | Humpback Whale         | Balaenopteridae | 2/12/1998      | 408      | Manale Harbor, Maui | F   | C         |
| 15121-001 | <i>T. truncatus</i>     | Bottlenose Dolphin     | Delphinidae     | 8/31/1998      | 608      | Punaluu, Oahu       | M   | C         |
| 15320-001 | <i>K. breviceps</i>     | Pygmy Sperm Whale      | Kogiadae        | 6/3/2000       | 1250     | Na Pali, Kauai      | M   | J         |
| 15377-001 | <i>K. sima</i>          | Dwarf Sperm Whale      | Kogiadae        | 8/31/2000      | 1339     | Kailua, Oahu        | M   | A         |
| KW2007003 | <i>K. breviceps</i>     | Pygmy Sperm Whale      | Kogiadae        | 4/25/2007      | 3767     | Kihei, Maui         | M   | A         |
| KW2007004 | <i>S. longirostris</i>  | Spinner Dolphin        | Delphinidae     | 6/30/2007      | 3833     | Punaluu, Oahu       | M   | J         |
| KW2007005 | <i>S. longirostris</i>  | Spinner Dolphin        | Delphinidae     | 9/30/2007      | 3925     | Waianae, Oahu       | F   | A         |
| KW2008003 | <i>M. novaeangliae</i>  | Humpback Whale         | Balaenopteridae | 2/25/2008      | 4073     | Lahaina, Maui       | F   | C         |
| KW2008004 | <i>S. longirostris</i>  | Spinner Dolphin        | Delphinidae     | 3/15/2008      | 4092     | Lahaina, Maui       | M   | A         |
| KW2008005 | <i>S. attenuata</i>     | Spotted Dolphin        | Delphinidae     | 5/16/2008      | 4154     | Honolulu, Oahu      | M   | J         |
| KW2008006 | <i>S. coeruleoalba</i>  | Striped Dolphin        | Delphinidae     | 6/21/2008      | 4190     | Hilo, Hawaii        | F   | C         |
| KW2008008 | <i>Z. cavirostris</i>   | Cuvier's Beaked W.     | Ziphiidae       | 7/28/2008      | 4227     | Kaunakakai, Molokai | M   | J         |
| KW2008009 | <i>S. longirostris</i>  | Spinner Dolphin        | Delphinidae     | 10/14/2008     | 4305     | Kailua-Kona, Hawaii | F   | A         |
| KW2008010 | <i>O. orca</i>          | Killer Whale           | Delphinidae     | 10/21/2008     | 4312     | Poipu, Kauai        | M   | A         |
| KW2008011 | <i>S. longirostris</i>  | Spinner Dolphin        | Delphinidae     | 11/29/2008     | 4351     | Waikoloa, Hawaii    | F   | A         |
| KW2009002 | <i>M. novaeangliae</i>  | Humpback Whale         | Balaenopteridae | 2/9/2009       | 4423     | Kekaha, Kauai       | F   | C         |
| KW2009004 | <i>S. longirostris</i>  | Spinner Dolphin        | Delphinidae     | 3/13/2009      | 4455     | Waianae, Oahu       | F   | C         |
| KW2009006 | <i>F. attenuata</i>     | Pygmy Killer Whale     | Delphinidae     | 5/22/2009      | 4525     | Maalaea, Maui       | M   | A         |
| KW2009008 | <i>S. coeruleoalba</i>  | Striped Dolphin        | Delphinidae     | 6/4/2009       | 4538     | Kailua, Oahu        | M   | J         |
| KW2009009 | <i>S. coeruleoalba</i>  | Striped Dolphin        | Delphinidae     | 6/14/2009      | 4548     | Maalaea, Maui       | F   | A         |
| KW2009011 | <i>S. coeruleoalba</i>  | Striped Dolphin        | Delphinidae     | 7/5/2009       | 4569     | Kihei, Maui         | F   | C         |
| KW2009012 | <i>K. sima</i>          | Dwarf Sperm Whale      | Kogiadae        | 8/27/2009      | 4622     | Kilauea, Kauai      | M   | A         |
| KW2009015 | <i>S. attenuata</i>     | Spotted Dolphin        | Delphinidae     | 11/25/2009     | 4712     | Kailua-Kona, Hawaii | M   | A         |
| KW2010005 | <i>I. pacificus</i>     | Longman's Beaked W.    | Ziphiidae       | 3/22/2010      | 4829     | Hana, Maui          | M   | J         |
| KW2010006 | <i>S. longirostris</i>  | Spinner Dolphin        | Delphinidae     | 4/15/2010      | 4853     | Waimanalo, Oahu     | M   | J         |
| KW2010007 | <i>T. truncatus</i>     | Bottlenose Dolphin     | Delphinidae     | 4/23/2010      | 4861     | Waikaloa, Hawaii    | M   | A         |
| KW2010008 | <i>S. coeruleoalba</i>  | Striped Dolphin        | Delphinidae     | 6/14/2010      | 4913     | Milolii, Hawaii     | M   | A         |
| KW2010011 | <i>S. attenuata</i>     | Spotted Dolphin        | Delphinidae     | 8/6/2010       | 4966     | Haputo, Guam        | M   | C         |
| KW2010012 | <i>M. densirostris</i>  | Blainville's Beaked W. | Ziphiidae       | 8/16/2010      | 4976     | Maalaea, Maui       | M   | J         |
| KW2010019 | <i>P. crassidens</i>    | False Killer Whale     | Delphinidae     | 11/27/2010     | 5079     | Kawela, Molokai     | F   | A         |
| KW2011001 | <i>T. truncatus</i>     | Bottlenose Dolphin     | Delphinidae     | 2/13/2011      | 5157     | Lydgate Park, Kauai | F   | J         |
| KW2011002 | <i>P. electra</i>       | Melon-headed Whale     | Delphinidae     | 3/20/2011      | 5192     | Kailua, Oahu        | M   | C         |
| KW2011003 | <i>T. truncatus</i>     | Bottlenose Dolphin     | Delphinidae     | 4/13/2011      | 5216     | Waikaloa, Hawaii    | M   | C         |
| KW2011006 | <i>T. truncatus</i>     | Bottlenose Dolphin     | Delphinidae     | 4/23/2011      | 5226     | Waikaloa, Hawaii    | F   | C         |
| KW2011007 | <i>T. truncatus</i>     | Bottlenose Dolphin     | Delphinidae     | 5/21/2011      | 5254     | Lydgate Park, Kauai | M   | A         |
| KW2011008 | <i>P. macrocephalus</i> | Sperm Whale            | Physeteridae    | 5/30/2011      | 5263     | Laie, Oahu          | F   | C         |
| KW2011009 | <i>P. electra</i>       | Melon-headed Whale     | Delphinidae     | 6/20/2011      | 5284     | Kosrae, Micronesia  | F   | C         |
| KW2011011 | <i>P. electra</i>       | Melon-headed Whale     | Delphinidae     | 7/8/2011       | 5302     | Waiehu, Maui        | M   | A         |
| KW2011013 | <i>S. longirostris</i>  | Spinner Dolphin        | Delphinidae     | 8/12/2011      | 5337     | Kona, Hawaii        | M   | C         |
| KW2011016 | <i>Z. cavirostris</i>   | Cuvier's Beaked W.     | Ziphiidae       | 8/23/2011      | 5348     | Saipan              | M   | A         |
| KW2011018 | <i>S. longirostris</i>  | Spinner Dolphin        | Delphinidae     | 8/30/2011      | 5355     | Nanakuli, Oahu      | F   | C         |
| KW2011021 | <i>S. bredanensis</i>   | Rough-toothed Dolphin  | Delphinidae     | 9/23/2011      | 5379     | Anaholo, Kauai      | M   | A         |
| KW2012002 | <i>S. coeruleoalba</i>  | Striped Dolphin        | Delphinidae     | 7/6/2012       | 5666     | Waimanalo, Oahu     | F   | A         |
| KW2012003 | <i>P. electra</i>       | Melon-headed Whale     | Delphinidae     | 7/9/2012       | 5669     | Kailua, Oahu        | M   | A         |
| KW2012004 | <i>S. longirostris</i>  | Spinner Dolphin        | Delphinidae     | 7/23/2012      | 5683     | Waianae, Oahu       | F   | C         |
| KW2013001 | <i>M. novaeangliae</i>  | Humpback Whale         | Balaenopteridae | 1/10/2013      | 5854     | Kaiolohia, Lanai    | F   | C         |
| KW2013002 | <i>M. novaeangliae</i>  | Humpback Whale         | Balaenopteridae | 1/15/2013      | 5859     | Hawaii Kai, Oahu    | M   | C         |
| KW2013006 | <i>S. coeruleoalba</i>  | Striped Dolphin        | Delphinidae     | 3/2/2013       | 5905     | Kailua, Oahu        | M   | J         |
| KW2013007 | <i>M. novaeangliae</i>  | Humpback Whale         | Balaenopteridae | 3/3/2013       | 5906     | Waianae, Oahu       | M   | C         |
| KW2013009 | <i>S. longirostris</i>  | Spinner Dolphin        | Delphinidae     | 3/8/2013       | 5911     | Kailua-Kona, Hawaii | M   | J         |
| KW2013010 | <i>M. novaeangliae</i>  | Humpback Whale         | Balaenopteridae | 3/17/2013      | 5920     | Lanai               | F   | C         |

**Table S2. Concentrations of PFAAs (ng/g, wet weight) Measured in SRM 1947 Samples.** SRM 1947-1 and SRM 1947-2 samples were prepared with liver samples and SRM 1947-3 and SRM 1947-4 were prepared with kidney samples. Values from the NIST SRM 1947 Certificate of Analysis (CoA) are listed for comparison. Concentrations shown as “<” a specific number describe the actual LOD.

| Compound | SRM 1947-1 | SRM 1947-2 | SRM 1947-3 | SRM 1947-4 | CoA SRM 1947 |
|----------|------------|------------|------------|------------|--------------|
| PFNA     | <2.16      | <4.73      | <2.90      | <2.52      | 0.20         |
| PFDA     | <0.349     | <0.765     | <0.750     | <0.653     | 0.26         |
| PFUnA    | <1.07      | <2.36      | <2.12      | <1.85      | 0.28         |
| PFDoA    | <0.353     | <0.772     | <0.757     | <0.659     | 0.20         |
| PFOS     | 5.20       | 6.07       | 5.67       | 5.74       | 5.90 ± 0.39  |

**Table S3. PCR Primers for PPAR $\alpha$ , CYP4A, and YWHAZ.** Primers for PPAR $\alpha$  and CYP4A were developed using a consensus sequence of four mammal species. The primers used for qPCR analysis are the first pairs listed for PPAR $\alpha$  (194 base pairs) and CYP4A (190 base pairs).

| Gene          | Forward Primer                   | Melting Temp. (°C) | Reverse Primer                   | Melting Temp. (°C) | Product Size (base pairs) |
|---------------|----------------------------------|--------------------|----------------------------------|--------------------|---------------------------|
| PPAR $\alpha$ | 5'- CAGGATCAGATGGCTCCGTT -3'     | 62.4               | 5'- GAAACCCTTGCAGCCTTCAC -3'     | 62.4               | 194                       |
|               | 5'- AGCCCATCTGTCCCCTCT -3'       | 64.5               | 5'- GCCTCCTTGTCTGGATGC -3'       | 62.3               | 702                       |
| CYP4A         | 5'- GAACGACATCATCTACAGGCTG -3'   | 62.7               | 5'- GCTCCATTCTCCATTCTGG -3'      | 62.4               | 190                       |
|               | 5'-TCCTTGATGACCCTGGACAC -3'      | 62.4               | 5'- AGCCTGGAGGAAAGGTGAG -3'      | 62.4               | 423                       |
| YWHAZ*        | 5'- AAATGAAAGGAGACTACTACCGTA -3' | 61.3               | 5'- AGACCAATCTGATAGGATGTGTTG -3' | 62.9               | 151                       |

\* Source: Spinsanti et al. 2006

**Table S4. Concentrations of All PFAAs (ng/g, ww) Measured in Liver Samples.** Concentrations shown as “<” a specific number describe the actual LOD. Abbreviations are utilized for *Common Name* (*W.* = Whale, *D.* = Dolphin.).

| Animal ID | Common Name               | PFBA  | PFPeA  | PFHxA  | PFHpA  | PFOA   | PFNA  | PFDA   | PFUnA | PFDoA  | PFTriA | PFTA   | PFBS   | PFHxS  | PFOS   | PFOSA  |
|-----------|---------------------------|-------|--------|--------|--------|--------|-------|--------|-------|--------|--------|--------|--------|--------|--------|--------|
| 12470-001 | Striped Dolphin           | <6.50 | <0.575 | <0.520 | <0.723 | <0.509 | 4.31  | 3.52   | 22.5  | 0.850  | 6.64   | <0.894 | <0.374 | <0.542 | 18.3   | 2.74   |
| 15028-001 | Spinner Dolphin           | <5.73 | <0.506 | 0.796  | <0.637 | 0.503  | 9.09  | 7.06   | 31.5  | 2.25   | 6.59   | <0.788 | <0.330 | <0.477 | 37.4   | 4.32   |
| 15063-001 | Humpback W.               | <7.06 | <0.624 | <0.565 | <0.785 | <0.552 | <3.68 | <0.595 | 4.73  | <0.600 | 1.66   | <0.971 | <0.406 | <0.588 | 1.24   | <0.700 |
| 15121-001 | Bottlenose D.             | <5.25 | <0.464 | <0.420 | <0.584 | <0.411 | 22.9  | 15.5   | 41.4  | 2.38   | 8.47   | <0.723 | <0.302 | <0.438 | 33.5   | 1.65   |
| 15320-001 | Pygmy Sperm W.            | <17.8 | <1.58  | <1.43  | <1.98  | <1.39  | <9.32 | <1.50  | <4.64 | <1.52  | 3.9    | <2.45  | <1.03  | <1.49  | 2.05   | <1.77  |
| 15377-001 | Dwarf Sperm W.            | <8.53 | <0.754 | <0.683 | <0.949 | <0.668 | <4.45 | 5.34   | 28.4  | 1.56   | 11.6   | <1.17  | <0.491 | <0.711 | 14.3   | 8.29   |
| KW2007003 | Pygmy Sperm W.            | <6.75 | <0.597 | <0.540 | <0.751 | <0.529 | <3.52 | <0.569 | <1.75 | <0.574 | <0.748 | <0.929 | <0.389 | <0.563 | <0.569 | 2.50   |
| KW2007004 | Spinner Dolphin           | <7.32 | <0.647 | <0.586 | <0.814 | 1.00   | 34.3  | 39.7   | 134   | 12.4   | 23.9   | 1.68   | <0.422 | 0.722  | 149    | 19.6   |
| KW2007005 | Spinner Dolphin           | <6.50 | <0.575 | <0.520 | <0.723 | <0.509 | 5.85  | 8.20   | 39.9  | 2.30   | 7.66   | <0.894 | <0.374 | <0.542 | 29.0   | 5.78   |
| KW2008004 | Spinner Dolphin           | <8.75 | <0.773 | <0.700 | <0.973 | 0.829  | 17.5  | 17.1   | 79.7  | 3.47   | 9.14   | <1.20  | <0.504 | <0.729 | 38.2   | <0.868 |
| KW2008006 | Striped Dolphin           | <8.35 | <0.737 | <0.668 | <0.928 | 3.18   | 99.6  | 57.5   | 149   | 9.93   | 20.3   | 1.75   | <0.481 | <0.695 | 106    | <0.828 |
| KW2008008 | Cuvier's Beaked Whale     | <8.22 | <0.727 | <0.658 | <0.915 | <0.644 | 15.7  | 14.5   | 83.8  | 8.50   | 25.9   | 2.04   | <0.474 | <0.685 | 17.8   | <0.816 |
| KW2008009 | Spinner Dolphin           | <8.49 | <0.750 | <0.679 | <0.944 | <0.664 | <4.42 | 1.7    | 16.4  | <0.721 | 3.41   | <1.16  | <0.489 | <0.707 | 5.00   | <0.842 |
| KW2008010 | Killer Whale              | <9.21 | <0.814 | <0.737 | <1.02  | <0.721 | <4.80 | 8.46   | 31.7  | 1.51   | 11.6   | <1.26  | <0.530 | <0.767 | 18.5   | 25.4   |
| KW2008011 | Spinner Dolphin           | <7.95 | <0.702 | <0.636 | <0.884 | <0.622 | 9.54  | 11.99  | 50.5  | 3.20   | 7.37   | <1.09  | <0.458 | <0.662 | 30.0   | <0.788 |
| KW2009002 | Humpback W.               | <5.38 | <0.476 | <0.431 | <0.599 | <0.421 | <2.81 | <0.453 | <1.40 | <0.458 | <0.596 | <0.741 | <0.310 | <0.448 | 0.472  | <0.534 |
| KW2009004 | Spinner Dolphin           | <7.59 | <0.671 | <0.607 | <0.844 | 0.972  | 16.7  | 21.5   | 69.5  | 5.20   | 9.04   | <1.04  | <0.437 | <0.632 | 45.6   | <0.753 |
| KW2009006 | Pygmy Killer W.           | <6.99 | <0.618 | <0.559 | <0.778 | <0.547 | 8.33  | 13.8   | 68.9  | 6.08   | 17.8   | 1.08   | <0.403 | <0.583 | 26.7   | 15.1   |
| KW2009008 | Striped Dolphin           | <9.60 | <0.848 | <0.768 | <1.068 | <0.751 | 16.6  | 23.2   | 85.1  | 5.58   | 22.9   | 1.85   | <0.553 | <0.800 | 33.7   | <0.952 |
| KW2009009 | Striped Dolphin           | <8.78 | <0.776 | <0.702 | <0.977 | 1.37   | 29.3  | 30.4   | 156   | 8.67   | 28.6   | 1.97   | <0.506 | <0.732 | 54.1   | 8.90   |
| KW2009011 | Striped Dolphin           | <9.85 | <0.870 | <0.788 | <1.09  | <0.771 | <5.13 | 12.32  | 62.2  | 3.17   | 14.1   | <1.35  | <0.567 | <0.820 | 18.2   | <0.977 |
| KW2009012 | Dwarf Sperm W.            | <9.42 | <0.832 | <0.753 | <1.04  | <0.737 | <4.91 | 4.768  | 25.4  | 1.48   | 14.1   | <1.29  | <0.542 | <0.785 | 5.67   | <0.934 |
| KW2009015 | Spotted Dolphin           | <8.49 | <0.750 | <0.679 | <0.944 | <0.664 | <4.42 | 2.9    | 12.7  | <0.721 | 3.20   | <1.16  | <0.489 | <0.707 | 9.00   | <0.842 |
| KW2010005 | Longman's Beaked Whale    | <7.07 | <0.625 | <0.566 | <0.786 | <0.553 | 31.9  | 38.1   | 170   | 18.3   | 46.8   | 3.45   | <0.407 | <0.589 | 24.8   | <0.701 |
| KW2010006 | Spinner Dolphin           | <5.52 | <0.488 | <0.442 | <0.614 | 1.07   | 31.6  | 24.7   | 76.6  | 5.17   | 10.8   | <0.759 | <0.318 | <0.460 | 64.4   | <0.548 |
| KW2010007 | Bottlenose D.             | <6.36 | <0.562 | <0.508 | <0.707 | 0.899  | <3.31 | 4.34   | 19.3  | 2.23   | 8.51   | 0.877  | <0.366 | <0.530 | 15.6   | 45.5   |
| KW2010008 | Striped Dolphin           | <8.87 | <0.783 | <0.709 | <0.986 | <0.694 | 4.86  | 7.80   | 29.1  | 0.875  | 6.97   | <1.22  | <0.511 | <0.739 | 15.8   | <0.879 |
| KW2010011 | Spotted Dolphin           | <9.36 | <0.827 | <0.749 | <1.04  | <0.733 | 8.16  | 4.3    | 22.1  | 2.11   | 10.4   | <1.28  | <0.539 | <0.780 | 6.96   | <0.928 |
| KW2010012 | Blainville's Beaked Whale | <7.75 | <0.684 | <0.620 | <0.862 | <0.606 | <4.04 | 17.4   | 118   | 9.07   | 23.4   | 1.57   | <0.446 | <0.645 | 10.8   | <0.768 |
| KW2010019 | False Killer W.           | <7.72 | <0.682 | <0.618 | <0.859 | <0.604 | <4.02 | 5.22   | 35.3  | 3.18   | 12.8   | 2.09   | <0.445 | <0.643 | 7.67   | 21.6   |
| KW2011001 | Bottlenose D.             | <9.32 | <0.824 | <0.746 | <1.03  | <0.730 | 20.2  | 30.7   | 115   | 10.8   | 25.7   | 2.23   | <0.537 | <0.777 | 30.4   | <0.925 |
| KW2011002 | Melon-headed W.           | <5.67 | <0.501 | <0.453 | <0.630 | 0.504  | 55.7  | 74.0   | 174   | 11.5   | 25.7   | 1.72   | <0.326 | <0.472 | 86.7   | 2.67   |
| KW2011003 | Bottlenose D.             | <6.84 | <0.604 | <0.547 | <0.760 | 0.856  | <3.56 | 1.2    | 6.83  | <0.581 | 3.45   | <0.940 | <0.394 | <0.569 | 6.83   | 4.49   |
| KW2011006 | Bottlenose D.             | <8.61 | <0.761 | <0.689 | <0.958 | 1.07   | <4.49 | 1.6    | 10.89 | 1.08   | 4.91   | <1.18  | <0.496 | <0.718 | 10.4   | 4.73   |
| KW2011007 | Bottlenose D.             | <7.05 | <0.623 | <0.564 | <0.784 | <0.552 | <3.67 | 4.54   | 29.9  | 16.6   | 40.9   | 24.0   | <0.406 | <0.587 | 10.3   | <0.699 |
| KW2011008 | Sperm Whale               | <6.82 | <0.602 | <0.545 | <0.758 | <0.533 | 26.0  | 39.0   | 114   | 9.27   | 36.9   | 2.62   | <0.392 | <0.568 | 18.8   | <0.676 |
| KW2011009 | Melon-headed W.           | <6.46 | <0.570 | <0.516 | <0.718 | <0.505 | 11.5  | 6.96   | 20.1  | 1.47   | 4.88   | <0.888 | <0.372 | <0.538 | 11.4   | <0.640 |
| KW2011011 | Melon-headed W.           | <7.52 | <0.664 | <0.601 | <0.836 | <0.588 | 11.8  | 9.93   | 23.1  | 0.742  | 7.05   | <1.03  | <0.433 | <0.626 | 16.9   | <0.745 |
| KW2011013 | Spinner Dolphin           | <7.42 | <0.655 | <0.593 | <0.825 | 1.54   | 19.5  | 10.40  | 20.8  | <0.631 | 3.27   | <1.02  | <0.427 | <0.618 | 20.6   | <0.736 |
| KW2011016 | Cuvier's Beaked Whale     | <7.22 | <0.638 | <0.577 | <0.803 | <0.565 | 15.4  | 13.6   | 104   | 20.3   | 61.1   | 4.31   | <0.416 | <0.601 | 13.8   | <0.716 |
| KW2011018 | Spinner Dolphin           | <8.66 | <0.765 | <0.693 | <0.964 | 2.07   | 31.7  | 19.4   | 46.4  | 2.11   | 6.21   | <1.19  | <0.499 | <0.722 | 44.8   | <0.859 |
| KW2011021 | Rough-toothed D.          | <6.69 | <0.591 | <0.535 | <0.744 | <0.523 | <3.48 | 1.57   | 10.46 | <0.568 | 3.48   | <0.920 | <0.385 | <0.557 | 3.81   | 0.939  |
| KW2012002 | Striped Dolphin           | <4.79 | <0.423 | <0.383 | <0.533 | <0.375 | 6.30  | 14.4   | 43.5  | 1.59   | 5.74   | <0.659 | <0.276 | <0.399 | 22.9   | 2.86   |
| KW2012003 | Melon-headed W.           | <7.02 | <0.620 | <0.561 | <0.780 | <0.549 | 4.71  | 9.52   | 28.8  | 1.00   | 6.57   | <0.965 | <0.404 | <0.584 | 13.4   | <0.696 |
| KW2012004 | Spinner Dolphin           | <6.57 | <0.580 | <0.525 | <0.731 | 1.44   | 23.0  | 15.9   | 36.9  | 2.34   | 7.24   | <0.904 | <0.378 | <0.547 | 32.2   | <0.651 |
| KW2013001 | Humpback W.               | <6.45 | <0.570 | <0.516 | <0.717 | <0.505 | <3.36 | <0.543 | 9.74  | <0.548 | 3.23   | <0.887 | <0.371 | <0.537 | 4.35   | <0.639 |
| KW2013002 | Humpback W.               | <5.56 | <0.491 | 0.559  | <0.618 | <0.435 | <2.89 | 2.762  | 14.2  | 1.35   | 3.41   | <0.764 | <0.320 | <0.463 | 11.6   | 1.05   |
| KW2013006 | Striped Dolphin           | <4.77 | <0.421 | <0.381 | <0.530 | 1.01   | 27.1  | 25.1   | 80.7  | 3.67   | 10.5   | 0.807  | <0.274 | <0.397 | 32.8   | <0.473 |
| KW2013007 | Humpback W.               | <7.01 | <0.619 | <0.560 | <0.779 | <0.548 | <3.65 | <0.590 | 3.41  | <0.596 | <0.776 | <0.964 | <0.403 | <0.584 | 4.30   | <0.695 |
| KW2013009 | Spinner Dolphin           | <5.26 | <0.465 | <0.421 | <0.585 | 0.512  | 10.1  | 18.3   | 46.3  | 2.30   | 5.65   | <0.723 | <0.303 | <0.438 | 795    | <0.522 |
| KW2013010 | Humpback W.               | <8.92 | <0.788 | <0.713 | <0.992 | <0.698 | <4.65 | 6.54   | 40.2  | 1.80   | 6.59   | <1.22  | <0.514 | <0.743 | 5.52   | <0.885 |

**Table S5. Concentrations of All PFAAs (ng/g, ww) Measured in Kidney Samples.** Concentrations shown as “<” a specific number describe the actual LOD. Abbreviations are utilized for *Common Name* (*W.* = Whale, *D.* = Dolphin.)

| Animal ID | Common Name               | PFBA  | PFPeA  | PFHxA  | PFHpA  | PFOA   | PFNA  | PFDA   | PFUnA | PFDoA  | PFTriA | PFTA   | PFBS   | PFHxS  | PFOS   | PFOSA  |
|-----------|---------------------------|-------|--------|--------|--------|--------|-------|--------|-------|--------|--------|--------|--------|--------|--------|--------|
| 12470-001 | Striped Dolphin           | <2.39 | <0.522 | <0.473 | <0.657 | <0.462 | <1.92 | 2.77   | 9.50  | <0.502 | 6.52   | 0.528  | <0.340 | <0.492 | 12.8   | 3.85   |
| 15063-001 | Humpback W.               | <3.17 | <0.693 | <0.627 | <0.872 | <0.614 | <2.55 | <0.660 | <1.87 | <0.667 | <0.689 | <0.651 | <0.451 | <0.653 | 1.23   | <0.778 |
| 15320-001 | Pygmy Sperm W.            | <3.67 | <0.801 | <0.725 | <1.00  | <0.709 | <2.95 | <0.763 | <2.16 | <0.770 | <0.796 | <0.753 | <0.522 | <0.755 | <0.763 | 1.61   |
| KW2007004 | Spinner Dolphin           | <2.66 | <0.581 | <0.526 | <0.732 | <0.515 | <2.14 | 2.24   | 6.28  | <0.559 | 3.55   | <0.546 | <0.379 | <0.548 | 13.2   | 3.72   |
| KW2007005 | Spinner Dolphin           | <2.19 | <0.479 | <0.434 | <0.603 | <0.424 | <1.76 | 2.17   | 5.29  | <0.461 | 4.02   | 0.624  | <0.312 | <0.452 | 8.60   | 5.10   |
| KW2008003 | Humpback Whale            | <2.99 | <0.653 | <0.591 | <0.822 | <0.579 | <2.41 | 0.981  | <1.76 | <0.629 | <0.650 | <0.614 | <0.426 | <0.616 | 6.55   | <0.733 |
| KW2008004 | Spinner Dolphin           | <2.47 | <0.540 | <0.489 | <0.679 | 0.884  | 8.71  | 6.36   | 26.3  | 0.906  | 6.50   | 0.592  | <0.352 | <0.509 | 17.3   | 3.08   |
| KW2008005 | Spotted Dolphin           | <2.84 | <0.620 | <0.561 | <0.780 | 0.989  | 5.73  | 5.18   | 15.8  | <0.596 | 7.13   | 0.814  | <0.404 | <0.584 | 14.5   | 6.81   |
| KW2008008 | Cuvier's Beaked Whale     | <2.80 | <0.612 | <0.554 | <0.771 | <0.542 | 2.51  | 4.97   | 21.4  | 2.80   | 24.4   | 2.34   | <0.399 | <0.577 | 10.6   | 1.25   |
| KW2008009 | Spinner Dolphin           | <2.34 | <0.511 | <0.462 | <0.643 | <0.452 | <1.88 | 0.95   | <1.38 | <0.492 | 1.81   | <0.480 | <0.333 | <0.482 | 1.76   | 1.34   |
| KW2008010 | Killer Whale              | <2.86 | <0.626 | <0.566 | <0.788 | <0.554 | <2.30 | 4.72   | 9.64  | <0.602 | 8.87   | 0.942  | <0.408 | <0.590 | 12.3   | 10.1   |
| KW2008011 | Spinner Dolphin           | <3.34 | <0.729 | <0.660 | <0.918 | <0.646 | <2.69 | 1.76   | 7.39  | <0.702 | 1.72   | <0.686 | <0.475 | <0.688 | 4.52   | 0.993  |
| KW2009002 | Humpback Whale            | <1.97 | <0.430 | <0.389 | <0.541 | <0.381 | <1.58 | <0.410 | <1.16 | <0.413 | <0.427 | <0.404 | <0.280 | <0.405 | 0.574  | <0.482 |
| KW2009004 | Spinner Dolphin           | <2.87 | <0.627 | <0.567 | <0.789 | 0.893  | 3.85  | 7.86   | 26.1  | 2.08   | 10.1   | 0.934  | <0.408 | <0.591 | 24.0   | 2.43   |
| KW2009006 | Pygmy Killer W.           | <2.83 | <0.618 | <0.559 | <0.778 | <0.547 | <2.28 | 4.88   | 18.8  | 1.10   | 11.5   | 1.14   | <0.403 | <0.583 | 9.15   | 10.6   |
| KW2009008 | Striped Dolphin           | <3.37 | <0.736 | <0.666 | <0.926 | <0.652 | <2.71 | 4.10   | 9.37  | <0.708 | 6.60   | 0.933  | <0.480 | <0.694 | 8.12   | <0.826 |
| KW2009009 | Striped Dolphin           | <2.47 | <0.540 | <0.489 | <0.679 | 0.989  | 6.19  | 5.17   | 17.2  | 1.10   | 13.0   | 1.49   | <0.352 | <0.509 | 13.2   | 5.44   |
| KW2009011 | Striped Dolphin           | <2.65 | <0.580 | <0.525 | <0.730 | <0.513 | <2.13 | 4.68   | 20.5  | <0.558 | 10.7   | 1.06   | <0.378 | <0.546 | 8.18   | 0.755  |
| KW2009012 | Dwarf Sperm W.            | <2.44 | <0.533 | <0.483 | <0.671 | <0.472 | <1.96 | 1.19   | <1.44 | <0.513 | 4.48   | 0.543  | <0.347 | <0.503 | 1.29   | 3.41   |
| KW2009015 | Spotted Dolphin           | <3.18 | <0.694 | <0.628 | <0.874 | <0.615 | <2.56 | 0.90   | <1.87 | <0.668 | <0.690 | <0.652 | <0.452 | <0.654 | 1.78   | 1.00   |
| KW2010005 | Longman's Beaked Whale    | <3.03 | <0.661 | <0.598 | <0.832 | <0.585 | 27.8  | 26.0   | 149   | 16.8   | 53.1   | 3.62   | <0.431 | <0.623 | 20.6   | <0.742 |
| KW2010006 | Spinner Dolphin           | <3.70 | <0.809 | <0.732 | <1.01  | <0.716 | 11.25 | 8.35   | 22.5  | <0.778 | 6.16   | 0.831  | <0.527 | <0.763 | 21.8   | 2.71   |
| KW2010007 | Bottlenose D.             | <2.54 | <0.555 | <0.502 | <0.698 | 0.968  | <2.04 | 2.45   | 6.19  | <0.534 | 6.30   | 0.809  | <0.361 | <0.523 | 9.91   | 15.3   |
| KW2010008 | Striped Dolphin           | <3.09 | <0.674 | <0.610 | <0.849 | <0.597 | <2.48 | 3.54   | 11.70 | <0.649 | 5.29   | 0.906  | <0.439 | <0.636 | 7.28   | <0.757 |
| KW2010011 | Spotted Dolphin           | <2.37 | <0.517 | <0.468 | <0.651 | <0.458 | 1.98  | 3.32   | 17.2  | 6.43   | 26.2   | 15.2   | <0.337 | <0.487 | 4.68   | <0.580 |
| KW2010012 | Blainville's Beaked Whale | <2.08 | <0.454 | <0.411 | <0.572 | <0.402 | <1.67 | 3.00   | 15.9  | <0.437 | 8.72   | 1.24   | <0.296 | <0.428 | 4.34   | 0.945  |
| KW2010019 | False Killer W.           | <2.87 | <0.627 | <0.567 | <0.789 | <0.555 | <2.31 | 3.82   | 17.3  | 0.959  | 12.6   | 1.31   | <0.408 | <0.591 | 4.80   | 8.22   |
| KW2011001 | Bottlenose D.             | <2.77 | <0.606 | <0.548 | <0.763 | 0.546  | 8.28  | 13.2   | 61.2  | 6.63   | 23.3   | 1.64   | <0.395 | <0.571 | 20.8   | 4.97   |
| KW2011002 | Melon-headed W.           | <2.33 | <0.509 | <0.461 | <0.641 | 0.630  | 37.4  | 27.1   | 59.7  | 3.80   | 16.3   | 1.40   | <0.332 | <0.480 | 34.3   | 2.67   |
| KW2011003 | Bottlenose D.             | <3.07 | <0.670 | <0.606 | <0.843 | 0.669  | <2.47 | 1.09   | <1.81 | <0.644 | 1.90   | 0.648  | <0.436 | <0.631 | 3.44   | 7.40   |
| KW2011006 | Bottlenose D.             | <2.76 | <0.603 | <0.546 | <0.759 | 0.759  | <2.22 | 1.24   | 4.75  | <0.580 | 3.03   | 0.617  | <0.393 | <0.569 | 5.22   | 3.16   |
| KW2011007 | Bottlenose D.             | <2.16 | <0.471 | <0.427 | <0.593 | <0.417 | <1.73 | 3.06   | 12.3  | 1.18   | 9.87   | 1.02   | <0.307 | <0.444 | 6.37   | 3.17   |
| KW2011008 | Sperm Whale               | <3.01 | <0.656 | <0.594 | <0.826 | 0.668  | 32.6  | 25.4   | 75.4  | 4.30   | 27.7   | 3.82   | <0.428 | <0.619 | 13.5   | <0.737 |
| KW2011009 | Melon-headed W.           | <3.64 | <0.796 | <0.721 | <1.00  | <0.705 | <2.93 | 2.08   | <2.15 | <0.766 | 2.09   | <0.748 | <0.519 | <0.750 | 3.70   | <0.893 |
| KW2011011 | Melon-headed W.           | <3.36 | <0.733 | <0.664 | <0.923 | <0.650 | 5.10  | 6.33   | 6.18  | <0.706 | 4.70   | 0.732  | <0.478 | <0.691 | 7.83   | 2.09   |
| KW2011013 | Spinner Dolphin           | <2.90 | <0.633 | <0.573 | <0.796 | 1.19   | 12.45 | 7.27   | 15.0  | <0.609 | 5.81   | 0.655  | <0.412 | <0.596 | 13.9   | 1.00   |
| KW2011016 | Cuvier's Beaked Whale     | <3.82 | <0.834 | <0.755 | <1.05  | <0.739 | <3.07 | 4.69   | 21.8  | 4.43   | 40.5   | 7.46   | <0.544 | <0.786 | 7.38   | <0.936 |
| KW2011018 | Spinner Dolphin           | <2.81 | <0.614 | <0.556 | <0.773 | 1.64   | 18.6  | 9.23   | 20.1  | 0.915  | 6.69   | 0.969  | <0.400 | <0.579 | 19.5   | 0.748  |
| KW2012002 | Striped Dolphin           | <2.80 | <0.612 | <0.554 | <0.771 | <0.542 | 2.70  | 7.34   | 17.0  | <0.589 | 6.62   | 0.719  | <0.399 | <0.577 | 16.5   | 5.26   |
| KW2012003 | Melon-headed W.           | <2.36 | <0.515 | <0.467 | <0.649 | <0.457 | <1.90 | 2.54   | 1.64  | <0.496 | 2.67   | 0.514  | <0.336 | <0.486 | 3.52   | 2.33   |
| KW2012004 | Spinner Dolphin           | <3.67 | <0.801 | <0.725 | <1.00  | 1.70   | 16.0  | 7.51   | 13.43 | <0.770 | 4.48   | <0.753 | <0.522 | <0.755 | 15.9   | <0.899 |
| KW2013001 | Humpback W.               | <2.82 | <0.617 | <0.559 | <0.777 | <0.547 | <2.27 | 0.87   | <1.66 | <0.594 | 1.56   | <0.580 | <0.402 | <0.582 | 2.15   | <0.693 |
| KW2013002 | Humpback W.               | <3.59 | <0.783 | <0.709 | <0.986 | <0.694 | <2.89 | 2.41   | 3.33  | <0.754 | 1.88   | <0.736 | <0.511 | <0.739 | 8.20   | 1.66   |
| KW2013006 | Striped Dolphin           | <2.63 | <0.575 | <0.521 | <0.724 | 1.28   | 25.1  | 11.0   | 40.1  | 1.22   | 10.7   | 1.19   | <0.375 | <0.543 | 19.7   | 1.10   |
| KW2013007 | Humpback W.               | <3.44 | <0.751 | <0.680 | <0.946 | <0.665 | <2.77 | 0.89   | <2.03 | <0.723 | <0.747 | <0.706 | <0.490 | <0.708 | 2.42   | <0.843 |
| KW2013009 | Spinner Dolphin           | <3.04 | <0.664 | <0.601 | <0.836 | 0.732  | 9.19  | 4.78   | 5.71  | <0.639 | 2.41   | <0.624 | <0.433 | <0.626 | 8.88   | 1.85   |
| KW2013010 | Humpback W.               | <3.87 | <0.844 | <0.765 | <1.06  | <0.748 | <3.11 | 5.85   | 22.3  | <0.813 | 4.66   | <0.794 | <0.550 | <0.796 | 4.76   | 0.995  |

**Table S6. Descriptive Statistics for PFAA Concentrations by Phylogenetic Family for Liver and Kidney.** The means, medians, standard deviations, and ranges represent all of the samples measured for liver (A.) and kidney (B.). Summation of concentrations for ΣPFCAs, ΣPFSAAs, and ΣPFAAs do not include any concentrations below the LOD (< LOD). The minimum concentrations of the ranges are the lowest detected value and does not include concentrations below the LOD unless otherwise specified. Ranges with one concentration listed had only one sample with detectable concentrations. Only one animal was sampled in family Physeteridae (sperm whale KW2011008).

**A. Liver**

| PFAA    | Phylogenetic Family | # Samples Detected (%) | Mean (ng/g, ww) | Median (ng/g, ww) | St. Dev. | Range (ng/g, ww) |
|---------|---------------------|------------------------|-----------------|-------------------|----------|------------------|
| PFOA    | Delphinidae         | 16 (44.4)              | 0.690           | < LOD             | 0.626    | 0.503 - 3.18     |
|         | Kogiadae            | 0 (0)                  | --              | --                | --       | --               |
|         | Ziphiidae           | 0 (0)                  | --              | --                | --       | --               |
|         | Balaenopteridae     | 0 (0)                  | --              | --                | --       | --               |
|         | Physeteridae        | 0 (0)                  | --              | --                | --       | --               |
| PFNA    | Delphinidae         | 26 (72.2)              | 15.6            | 9.32              | 19.0     | 4.31 - 99.6      |
|         | Kogiadae            | 0 (0)                  | --              | --                | --       | --               |
|         | Ziphiidae           | 3 (75.0)               | 16.3            | 15.6              | 12.2     | 15.4 - 31.9      |
|         | Balaenopteridae     | 0 (0)                  | --              | --                | --       | --               |
|         | Physeteridae        | 1 (100)                | --              | --                | --       | 26               |
| PFDA    | Delphinidae         | 36 (100)               | 15.7            | 11.2              | 15.6     | 1.20* - 74.0     |
|         | Kogiadae            | 2 (50.0)               | 2.79            | < LOD             | 2.63     | 4.77 - 5.34      |
|         | Ziphiidae           | 4 (100)                | 20.9            | 16.0              | 11.6     | 13.6* - 38.1     |
|         | Balaenopteridae     | 2 (33.3)               | 1.73            | < LOD             | 2.56     | 2.76 - 6.54      |
|         | Physeteridae        | 1 (100)                | --              | --                | --       | 39               |
| PFUnA   | Delphinidae         | 36 (100)               | 53.5            | 38.4              | 43.7     | 6.83* - 174      |
|         | Kogiadae            | 2 (50.0)               | 14.2            | < LOD             | 14.7     | 25.4 - 28.4      |
|         | Ziphiidae           | 4 (100)                | 119             | 111               | 36.8     | 83.8* - 170      |
|         | Balaenopteridae     | 5 (83.2)               | 12.2            | 7.24              | 14.6     | 3.41 - 40.2      |
|         | Physeteridae        | 1 (100)                | --              | --                | --       | 114              |
| PFDoA   | Delphinidae         | 31 (86.1)              | 3.82            | 2.30              | 3.99     | 0.742 - 16..6    |
|         | Kogiadae            | 2 (50.0)               | 1.02            | < LOD             | 0.608    | 1.48 - 1.56      |
|         | Ziphiidae           | 4 (100)                | 14.0            | 13.7              | 6.13     | 8.50* - 20.3     |
|         | Balaenopteridae     | 2 (33.3)               | 0.709           | < LOD             | 0.687    | 1.35 - 1.80      |
|         | Physeteridae        | 1 (100)                | --              | --                | --       | 9.27             |
| PFTriA  | Delphinidae         | 36 (100)               | 11.4            | 8.07              | 8.75     | 3.20* - 40.9     |
|         | Kogiadae            | 3 (75.0)               | 7.50            | 7.77              | 6.42     | 3.94 - 14.1      |
|         | Ziphiidae           | 4 (100)                | 39.3            | 36.4              | 17.9     | 23.4* - 61.1     |
|         | Balaenopteridae     | 4 (66.7)               | 2.60            | 2.45              | 2.37     | 1.66 - 6.59      |
|         | Physeteridae        | 1 (100)                | --              | --                | --       | 36.9             |
| PFTA    | Delphinidae         | 11 (30.6)              | 1.46            | < LOD             | 3.90     | 0.807 - 24.0     |
|         | Kogiadae            | 0 (0)                  | --              | --                | --       | --               |
|         | Ziphiidae           | 4 (100)                | 2.84            | 2.75              | 1.26     | 1.57* - 4.31     |
|         | Balaenopteridae     | 0 (0)                  | --              | --                | --       | --               |
|         | Physeteridae        | 1 (100)                | --              | --                | --       | 2.62             |
| ΣPFCAs  | Delphinidae         | 36 (100)               | 101             | 77.1              | 84.5     | 12.3 - 343       |
|         | Kogiadae            | 3 (75.0)               | 24.1            | 24.8              | 25.7     | 3.94 - 46.9      |
|         | Ziphiidae           | 4 (100)                | 212             | 194               | 70.6     | 150 - 309        |
|         | Balaenopteridae     | 5 (83.2)               | 16.6            | 9.68              | 20.4     | 3.41 - 55.1      |
|         | Physeteridae        | 1 (100)                | --              | --                | --       | 228              |
| PFOS    | Delphinidae         | 36 (100)               | 52.8            | 24.8              | 131      | 3.81* - 795      |
|         | Kogiadae            | 3 (75.0)               | 5.58            | 3.86              | 6.23     | 2.05 - 14.3      |
|         | Ziphiidae           | 4 (100)                | 16.8            | 15.8              | 6.06     | 10.8* - 24.8     |
|         | Balaenopteridae     | 6 (100)                | 4.58            | 4.33              | 3.96     | 0.472* - 11.6    |
|         | Physeteridae        | 1 (100)                | --              | --                | --       | 18.8             |
| PFOSA   | Delphinidae         | 15 (41.7)              | 4.84            | < LOD             | 9.49     | 0.939 - 45.5     |
|         | Kogiadae            | 2 (50.0)               | 3.04            | < LOD             | 3.61     | 2.50 - 8.29      |
|         | Ziphiidae           | 0 (0)                  | --              | --                | --       | --               |
|         | Balaenopteridae     | 1 (16.7)               | --              | --                | --       | 1.05             |
|         | Physeteridae        | 0 (0)                  | --              | --                | --       | --               |
| ΣPFSAAs | Delphinidae         | 36 (100)               | 57.4            | 31.3              | 130      | 4.75 - 795       |
|         | Kogiadae            | 3 (75.0)               | 8.20            | 4.09              | 9.73     | 2.05 - 22.59     |
|         | Ziphiidae           | 4 (100)                | 16.8            | 15.8              | 6.06     | 10.8 - 24.8      |
|         | Balaenopteridae     | 6 (100)                | 4.76            | 4.33              | 4.34     | 0.472 - 12.7     |
|         | Physeteridae        | 1 (100)                | --              | --                | --       | 18.8             |
| ΣPFAAs  | Delphinidae         | 36 (100)               | 159             | 105               | 166      | 20.3 - 878       |
|         | Kogiadae            | 4 (100)                | 32.3            | 28.7              | 33.3     | 2.50 - 69.4      |
|         | Ziphiidae           | 4 (100)                | 228             | 206               | 75.6     | 168 - 333        |
|         | Balaenopteridae     | 6 (100)                | 21.4            | 22.6              | 22.6     | 0.472 - 60.6     |
|         | Physeteridae        | 1 (100)                | --              | --                | --       | 247              |

\* The concentration is the actual minimum.

## B. Kidney

| PFAA   | Phylogenetic Family | # Samples Detected (%) | Mean (ng/g, ww) | Median (ng/g, ww) | St. Dev. | Range (ng/g, ww) |
|--------|---------------------|------------------------|-----------------|-------------------|----------|------------------|
| PFOA   | Delphinidae         | 14 (42.4)              | 0.579           | < LOD             | 0.425    | 0.546 - 1.70     |
|        | Kogiadae            | 0 (0)                  | --              | --                | --       | --               |
|        | Ziphiidae           | 0 (0)                  | --              | --                | --       | --               |
|        | Balaenopteridae     | 0 (0)                  | --              | --                | --       | --               |
|        | Physeteridae        | 1 (100)                | --              | --                | --       | 0.668            |
| PFNA   | Delphinidae         | 15 (45.5)              | 5.84            | < LOD             | 8.22     | 1.98 - 37.4      |
|        | Kogiadae            | 0 (0)                  | --              | --                | --       | --               |
|        | Ziphiidae           | 2 (50.0)               | 8.17            | 2.03              | 13.1     | 2.51 - 27.8      |
|        | Balaenopteridae     | 0 (0)                  | --              | --                | --       | --               |
|        | Physeteridae        | 1 (100)                | --              | --                | --       | 32.6             |
| PFDA   | Delphinidae         | 33 (100)               | 5.42            | 4.68              | 4.90     | 0.901* - 27.1    |
|        | Kogiadae            | 1 (50.0)               | --              | --                | --       | 1.19             |
|        | Ziphiidae           | 4 (100)                | 9.7             | 4.83              | 10.9     | 3.00* - 26.0     |
|        | Balaenopteridae     | 5 (71.4)               | 1.65            | 0.891             | 1.99     | 0.868 - 5.85     |
|        | Physeteridae        | 1 (100)                | --              | --                | --       | 25.4             |
| PFUnA  | Delphinidae         | 29 (87.9)              | 15.4            | 12.3              | 14.6     | 1.64 - 61.2      |
|        | Kogiadae            | 0 (0)                  | --              | --                | --       | --               |
|        | Ziphiidae           | 4 (100)                | 52.0            | 21.6              | 64.7     | 15.9* - 149      |
|        | Balaenopteridae     | 2 (28.6)               | 4.27            | < LOD             | 8.01     | 3.33 - 22.3      |
|        | Physeteridae        | 1 (100)                | --              | --                | --       | 75.4             |
| PFDoA  | Delphinidae         | 11 (33.3)              | 1.00            | < LOD             | 1.59     | 0.906 - 6.63     |
|        | Kogiadae            | 0 (0)                  | --              | --                | --       | --               |
|        | Ziphiidae           | 3 (75.0)               | 6.06            | 3.62              | 7.37     | 2.80 - 16.8      |
|        | Balaenopteridae     | 0 (0)                  | --              | --                | --       | --               |
|        | Physeteridae        | 1 (100)                | --              | --                | --       | 4.30             |
| PFTriA | Delphinidae         | 32 (97.0)              | 7.56            | 6.50              | 5.84     | 1.72 - 26.2      |
|        | Kogiadae            | 1 (50.0)               | --              | --                | --       | 4.48             |
|        | Ziphiidae           | 4 (100)                | 31.7            | 32.5              | 19.3     | 8.72* - 53.1     |
|        | Balaenopteridae     | 3 (42.9)               | 1.34            | < LOD             | 1.61     | 1.56 - 4.66      |
|        | Physeteridae        | 1 (100)                | --              | --                | --       | 27.7             |
| PFTA   | Delphinidae         | 26 (78.8)              | 1.23            | 0.809             | 2.53     | 0.514 - 15.2     |
|        | Kogiadae            | 1 (50.0)               | --              | --                | --       | 0.543            |
|        | Ziphiidae           | 4 (100)                | 3.67            | 2.98              | 2.71     | 1.24* - 7.46     |
|        | Balaenopteridae     | 0 (0)                  | --              | --                | --       | --               |
|        | Physeteridae        | 1 (100)                | --              | --                | --       | 3.82             |
| ΣPFCAs | Delphinidae         | 33 (100)               | 35.9            | 27.4              | 32.1     | 0.901* - 146     |
|        | Kogiadae            | 1 (50.0)               | --              | --                | --       | 6.22             |
|        | Ziphiidae           | 4 (100)                | 111             | 68.6              | 112      | 28.9* - 276      |
|        | Balaenopteridae     | 5 (71.4)               | 6.40            | 0.981             | 12.0     | 0.891 - 32.9     |
|        | Physeteridae        | 1 (100)                | --              | --                | --       | 170              |
| PFOS   | Delphinidae         | 33 (100)               | 11.4            | 9.15              | 7.42     | 1.76* - 34.3     |
|        | Kogiadae            | 1 (50.0)               | --              | --                | --       | 1.29             |
|        | Ziphiidae           | 4 (100)                | 10.7            | 8.99              | 7.06     | 4.34* - 20.6     |
|        | Balaenopteridae     | 7 (100)                | 3.70            | 2.42              | 2.87     | 0.574* - 8.20    |
|        | Physeteridae        | 1 (100)                | --              | --                | --       | 13.5             |
| PFOSA  | Delphinidae         | 28 (84.8)              | 3.61            | 2.67              | 3.51     | 0.748 - 15.3     |
|        | Kogiadae            | 2 (100)                | 2.51            | 2.51              | 1.27     | 1.61* - 3.41     |
|        | Ziphiidae           | 2 (50.0)               | 0.759           | 0.707             | 0.413    | 0.945 - 1.25     |
|        | Balaenopteridae     | 2 (28.6)               | 0.631           | < LOD             | 0.516    | 0.995 - 1.66     |
|        | Physeteridae        | 0 (0)                  | --              | --                | --       | --               |
| ΣPFSAs | Delphinidae         | 33 (100)               | 15.0            | 14.9              | 8.25     | 2.78 - 36.9      |
|        | Kogiadae            | 2 (100)                | 3.15            | 3.15              | 2.17     | 1.61 - 4.70      |
|        | Ziphiidae           | 4 (100)                | 11.3            | 9.62              | 6.80     | 5.28 - 20.6      |
|        | Balaenopteridae     | 7 (100)                | 4.07            | 2.42              | 3.40     | 0.574 - 9.86     |
|        | Physeteridae        | 1 (100)                | --              | --                | --       | 13.5             |
| ΣPFAAs | Delphinidae         | 33 (100)               | 50.8            | 45.9              | 38.3     | 3.68 - 183       |
|        | Kogiadae            | 2 (100)                | 6.27            | 6.27              | 6.58     | 1.61 - 10.9      |
|        | Ziphiidae           | 4 (100)                | 122             | 78.3              | 119      | 34.1 - 297       |
|        | Balaenopteridae     | 7 (100)                | 10.5            | 4.58              | 13.7     | 0.574 - 38.6     |
|        | Physeteridae        | 1 (100)                | --              | --                | --       | 183              |

\* The concentration is the actual minimum.



**Table S7. Descriptive Statistics for PFAA Concentrations by Age Class for Liver and Kidney Samples.** The means, medians, standard deviations, and ranges represent all of the samples measured for liver (A.) and kidney (B.). Summation of concentrations for  $\Sigma$ PFCAs,  $\Sigma$ PFASAs, and  $\Sigma$ PFAAs do not include any concentrations below the LOD. The minimum concentrations of the ranges are the lowest detected value and does not include concentrations below the LOD unless otherwise specified. Ranges with one concentration listed had only one sample with detectable concentrations.

**A. Liver**

| PFAA            | Age Class | # Samples Detected (%) | Mean (ng/g, ww) | Median (ng/g, ww) | St. Dev. | Range (ng/g, ww) |
|-----------------|-----------|------------------------|-----------------|-------------------|----------|------------------|
| PFOA            | Adults    | 3 (14.3)               | 0.401           | < LOD             | 0.283    | 0.829 - 1.37     |
|                 | Juveniles | 4 (40.0)               | 0.593           | < LOD             | 0.323    | 0.512 - 1.07     |
|                 | Calves    | 9 (45.0)               | 0.760           | < LOD             | 0.779    | 0.503 - 3.18     |
| PFNA            | Adults    | 11 (52.4)              | 6.59            | 4.31              | 6.97     | 4.31 - 29.3      |
|                 | Juveniles | 8 (80.0)               | 19.4            | 18.4              | 11.6     | 10.1 - 34.3      |
|                 | Calves    | 11 (55.0)              | 17.0            | 8.63              | 24.0     | 8.16 - 99.6      |
| PFDA            | Adults    | 20 (95.2)              | 8.55            | 7.80              | 6.87     | 1.57 - 30.4      |
|                 | Juveniles | 9 (90.0)               | 23.2            | 24.0              | 11.5     | 14.5 - 39.7      |
|                 | Calves    | 16 (80.0)              | 14.9            | 7.01              | 20.1     | 1.25 - 74.0      |
| PFUnA           | Adults    | 20 (95.2)              | 40.8            | 29.1              | 35.8     | 10.5 - 156       |
|                 | Juveniles | 9 (90.0)               | 91.2            | 84.5              | 46.7     | 46.3 - 170       |
|                 | Calves    | 19 (95.0)              | 43.9            | 26.8              | 48.8     | 3.41 - 174       |
| PFDoA           | Adults    | 17 (81.0)              | 3.66            | 1.56              | 5.35     | 0.742 - 20.3     |
|                 | Juveniles | 9 (90.0)               | 7.66            | 7.04              | 5.28     | 2.30 - 18.3      |
|                 | Calves    | 14 (70.0)              | 2.88            | 1.96              | 3.42     | 1.08 - 11.5      |
| PFTriA          | Adults    | 20 (95.2)              | 13.1            | 7.66              | 14.3     | 3.20 - 61.1      |
|                 | Juveniles | 10 (100)               | 19.9            | 23.2              | 12.7     | 3.94* - 46.8     |
|                 | Calves    | 18 (90.0)              | 8.85            | 6.40              | 9.18     | 1.66 - 36.9      |
| PFTA            | Adults    | 6 (28.6)               | 2.01            | < LOD             | 5.12     | 0.877 - 24.0     |
|                 | Juveniles | 7 (70.0)               | 1.56            | 1.63              | 0.934    | 0.807 - 3.45     |
|                 | Calves    | 3 (15.0)               | 0.726           | < LOD             | 0.593    | 1.72 - 2.62      |
| $\Sigma$ PFCAs  | Adults    | 20 (95.2)              | 73.3            | 52.6              | 63.9     | 15.5 - 256       |
|                 | Juveniles | 10 (100)               | 162             | 153               | 83.1     | 3.94 - 308       |
|                 | Calves    | 19 (95.0)              | 87.5            | 55.3              | 102      | 3.41 - 344       |
| PFOS            | Adults    | 20 (95.2)              | 17.6            | 15.6              | 12.7     | 3.81 - 54.1      |
|                 | Juveniles | 10 (100)               | 116             | 31.6              | 242      | 2.05* - 795      |
|                 | Calves    | 20 (100)               | 25.3            | 14.9              | 28.3     | 0.472* - 106     |
| PFOSA           | Adults    | 11 (52.4)              | 6.84            | 0.939             | 11.5     | 0.939 - 45.5     |
|                 | Juveniles | 1 (10.0)               | 2.33            | < LOD             | 6.07     | 19.6             |
|                 | Calves    | 6 (30.0)               | 1.21            | < LOD             | 1.54     | 1.05 - 4.73      |
| $\Sigma$ PFASAs | Adults    | 21 (100)               | 24.2            | 21.0              | 17.7     | 2.50 - 63.0      |
|                 | Juveniles | 10 (100)               | 118             | 31.6              | 243      | 2.05 - 795       |
|                 | Calves    | 20 (100)               | 26.3            | 16.7              | 28.5     | 0.472 - 106      |
| $\Sigma$ PFAAs  | Adults    | 21 (100)               | 97.5            | 87.9              | 73.8     | 2.50 - 319       |
|                 | Juveniles | 10 (100)               | 280             | 202               | 236      | 5.99 - 878       |
|                 | Calves    | 20 (100)               | 114             | 68.4              | 128      | 0.472 - 447      |

\* The concentration is the actual minimum.

**B. Kidney**

| PFAA               | Age Class | # Samples Detected (%) | Mean (ng/g, ww) | Median (ng/g, ww) | St. Dev. | Range (ng/g, ww) |
|--------------------|-----------|------------------------|-----------------|-------------------|----------|------------------|
| PFOA               | Adults    | 3 (16.7)               | 0.384           | < LOD             | 0.263    | 0.884 - 0.989    |
|                    | Juveniles | 4 (36.3)               | 0.510           | < LOD             | 0.349    | 0.546 - 1.28     |
|                    | Calves    | 8 (44.4)               | 0.617           | < LOD             | 0.467    | 0.630 - 1.70     |
| PFNA               | Adults    | 4 (22.2)               | 2.12            | < LOD             | 2.23     | 2.70 - 8.71      |
|                    | Juveniles | 7 (63.6)               | 8.60            | 5.73              | 9.56     | 2.51 - 27.8      |
|                    | Calves    | 7 (38.9)               | 7.59            | < LOD             | 11.4     | 1.98 - 37.4      |
| PFDA               | Adults    | 18 (100)               | 3.59            | 3.30              | 1.95     | 0.901* - 7.34    |
|                    | Juveniles | 10 (90.9)              | 7.56            | 4.97              | 7.19     | 2.24 - 26.0      |
|                    | Calves    | 16 (88.9)              | 6.02            | 2.87              | 7.92     | 0.868 - 27.1     |
| PFUnA              | Adults    | 15 (83.3)              | 10.6            | 9.57              | 7.75     | 1.64 - 26.3      |
|                    | Juveniles | 10 (90.9)              | 31.7            | 15.9              | 42.6     | 5.71 - 149       |
|                    | Calves    | 11 (61.1)              | 15.8            | 9.08              | 21.0     | 3.33 - 75.4      |
| PFDoA              | Adults    | 6 (33.3)               | 0.730           | < LOD             | 0.989    | 0.906 - 4.43     |
|                    | Juveniles | 4 (36.3)               | 2.70            | < LOD             | 5.06     | 1.22 - 16.8      |
|                    | Calves    | 5 (27.8)               | 1.21            | < LOD             | 1.79     | 0.915 - 6.43     |
| PFTriA             | Adults    | 17 (94.4)              | 8.18            | 6.40              | 8.87     | 1.72 - 40.5      |
|                    | Juveniles | 10 (90.9)              | 13.3            | 7.13              | 15.3     | 2.41 - 53.1      |
|                    | Calves    | 14 (77.8)              | 6.91            | 3.76              | 8.47     | 1.56 - 27.7      |
| PFTA               | Adults    | 15 (83.3)              | 1.12            | 0.726             | 1.62     | 0.514 - 7.46     |
|                    | Juveniles | 8 (72.7)               | 1.23            | 0.933             | 1.00     | 0.814 - 3.62     |
|                    | Calves    | 9 (50.0)               | 1.57            | < LOD             | 3.50     | 0.617 - 15.2     |
| ΣPFCA <sub>s</sub> | Adults    | 18 (100)               | 25.2            | 22.2              | 19.6     | 0.901 - 78.8     |
|                    | Juveniles | 10 (90.9)              | 64.5            | 35.7              | 78.0     | 12.1 - 276       |
|                    | Calves    | 16 (88.9)              | 37.9            | 21.7              | 49.5     | 0.891 - 170      |
| PFOS               | Adults    | 18 (100)               | 8.13            | 7.61              | 4.86     | 1.29* - 17.3     |
|                    | Juveniles | 10 (90.9)              | 13.0            | 13.2              | 7.24     | 4.34 - 21.8      |
|                    | Calves    | 18 (100)               | 9.57            | 5.89              | 9.08     | 0.574* - 34.3    |
| PFOSA              | Adults    | 16 (88.9)              | 4.56            | 3.29              | 4.09     | 0.993 - 15.3     |
|                    | Juveniles | 9 (81.8)               | 2.34            | 1.61              | 2.05     | 0.945 - 6.81     |
|                    | Calves    | 9 (50.0)               | 1.34            | < LOD             | 1.76     | 0.748 - 7.40     |
| ΣPFSA <sub>s</sub> | Adults    | 18 (100)               | 12.6            | 11.5              | 7.37     | 2.78 - 25.2      |
|                    | Juveniles | 11 (100)               | 15.2            | 16.9              | 8.13     | 1.61 - 25.7      |
|                    | Calves    | 18 (100)               | 10.7            | 8.66              | 9.54     | 0.574 - 36.9     |
| ΣPFAA <sub>s</sub> | Adults    | 18 (100)               | 37.9            | 36.5              | 23.3     | 3.68 - 86.2      |
|                    | Juveniles | 11 (100)               | 79.6            | 56.9              | 82.4     | 1.61 - 297       |
|                    | Calves    | 18 (100)               | 48.6            | 28.7              | 56.2     | 0.574 - 183      |

\* The concentration is the actual minimum.

**Table S8. Descriptive Statistics for PFAA Concentrations by Sex for Liver and Kidney.** The means, medians, standard deviations, and ranges represent all of the samples measured for liver (A.) and kidney (B.). Summation of concentrations for ΣPFCAs, ΣPFSAAs, and ΣPFAAs do not include any concentrations below the LOD (< LOD). The minimum concentrations of the ranges are the lowest detected value and does not include concentrations below the LOD unless otherwise specified.

**A. Liver**

| PFAA    | Sex     | # Samples Detected (%) | Mean (ng/g, ww) | Median (ng/g, ww) | St. Dev. | Range (ng/g, ww) |
|---------|---------|------------------------|-----------------|-------------------|----------|------------------|
| PFOA    | Females | 6 (31.6)               | 0.729           | < LOD             | 0.798    | 0.972 - 3.18     |
|         | Males   | 10 (31.3)              | 0.490           | < LOD             | 0.324    | 0.503 - 1.54     |
| PFNA    | Females | 11 (57.9)              | 15.6            | 6.30              | 22.8     | 5.85 - 99.6      |
|         | Males   | 19 (59.4)              | 11.8            | 6.51              | 12.9     | 4.31 - 55.7      |
| PFDA    | Females | 16 (84.2)              | 15.0            | 12.0              | 15.3     | 1.64 - 57.5      |
|         | Males   | 29 (90.6)              | 13.3            | 8.99              | 15.0     | 1.25 - 74.0      |
| PFUnA   | Females | 18 (94.7)              | 53.7            | 40.2              | 47.1     | 4.73 - 156       |
|         | Males   | 30 (93.8)              | 50.8            | 29.5              | 47.4     | 3.41 - 174       |
| PFDoA   | Females | 15 (78.9)              | 3.54            | 2.30              | 3.50     | 1.10 - 10.8      |
|         | Males   | 25 (78.1)              | 4.50            | 2.17              | 5.61     | 0.700 - 20.3     |
| PFTriA  | Females | 18 (94.7)              | 10.9            | 7.24              | 10.0     | 1.70 - 36.9      |
|         | Males   | 32 (100)               | 13.9            | 8.83              | 14.0     | 3.20* - 61.1     |
| PFTA    | Females | 5 (26.3)               | 0.934           | < LOD             | 0.756    | 1.75 - 2.62      |
|         | Males   | 11 (34.4)              | 1.71            | < LOD             | 4.17     | 0.807 - 24       |
| ΣPFCAs  | Females | 18 (94.7)              | 98.8            | 72.1              | 92.9     | 6.39 - 341       |
|         | Males   | 32 (100)               | 94.8            | 56.5              | 87.1     | 3.41 - 344       |
| PFOS    | Females | 19 (100)               | 25.2            | 18.8              | 25.3     | 0.472* - 106     |
|         | Males   | 31 (96.9)              | 48.7            | 16.4              | 139      | 2.05 - 795       |
| PFOSA   | Females | 5 (26.3)               | 2.59            | < LOD             | 5.19     | 2.86 - 21.6      |
|         | Males   | 13 (40.6)              | 4.43            | < LOD             | 9.56     | 0.939 - 45.5     |
| ΣPFSAAs | Females | 19 (100)               | 27.5            | 25.8              | 25.5     | 0.472 - 107      |
|         | Males   | 32 (100)               | 52.9            | 19.6              | 139      | 2.05 - 795       |
| ΣPFAAs  | Females | 19 (100)               | 126             | 98.7              | 116      | 0.472 - 447      |
|         | Males   | 32 (100)               | 148             | 97.2              | 172      | 2.50 - 878       |

\* The concentration is the actual minimum.

**B. Kidney**

| PFAA    | Sex     | # Samples Detected (%) | Mean (ng/g, ww) | Median (ng/g, ww) | St. Dev. | Range (ng/g, ww) |
|---------|---------|------------------------|-----------------|-------------------|----------|------------------|
| PFOA    | Females | 7 (36.8)               | 0.555           | < LOD             | 0.459    | 0.546 - 1.70     |
|         | Males   | 8 (28.6)               | 0.467           | < LOD             | 0.318    | 0.630 - 1.28     |
| PFNA    | Females | 8 (42.1)               | 5.38            | < LOD             | 8.37     | 2.70 - 32.6      |
|         | Males   | 10 (35.7)              | 5.97            | < LOD             | 9.30     | 1.98 - 37.4      |
| PFDA    | Females | 17 (89.5)              | 5.30            | 3.82              | 6.04     | 0.868 - 25.4     |
|         | Males   | 27 (96.4)              | 5.55            | 3.82              | 6.40     | 0.891 - 27.1     |
| PFUnA   | Females | 13 (68.4)              | 16.5            | 13.4              | 20.3     | 4.75 - 75.4      |
|         | Males   | 23 (82.1)              | 18.2            | 10.7              | 28.8     | 1.64 - 149       |
| PFDoA   | Females | 5 (26.3)               | 1.05            | < LOD             | 1.67     | 0.915 - 6.63     |
|         | Males   | 10 (35.7)              | 1.59            | < LOD             | 3.34     | 0.906 - 16.8     |
| PFTriA  | Females | 16 (84.2)              | 7.10            | 4.48              | 7.69     | 1.56 - 27.7      |
|         | Males   | 25 (89.3)              | 10.1            | 6.40              | 12.2     | 1.86 - 53.1      |
| PFTA    | Females | 10 (52.6)              | 0.844           | 0.617             | 0.845    | 0.617 - 3.82     |
|         | Males   | 22 (78.6)              | 1.65            | 0.812             | 3.01     | 0.514 - 15.2     |
| ΣPFCAs  | Females | 17 (89.5)              | 35.1            | 34.9              | 42.5     | 0.981 - 170      |
|         | Males   | 27 (96.4)              | 42.1            | 24.8              | 55.6     | 0.891 - 277      |
| PFOS    | Females | 19 (100)               | 9.23            | 6.55              | 7.27     | 0.574* - 24.0    |
|         | Males   | 27 (96.4)              | 10.2            | 8.54              | 7.52     | 1.29 - 34.3      |
| PFOSA   | Females | 12 (63.2)              | 2.21            | 0.993             | 2.41     | 0.748 - 8.22     |
|         | Males   | 22 (78.6)              | 3.21            | 1.97              | 3.65     | 0.945 - 15.3     |
| ΣPFSAAs | Females | 19 (100)               | 11.3            | 8.93              | 8.23     | 0.574 - 26.4     |
|         | Males   | 28 (100)               | 13.3            | 10.8              | 8.51     | 1.61 - 36.9      |
| ΣPFAAs  | Females | 19 (100)               | 46.4            | 38.6              | 48.7     | 0.574 - 183      |
|         | Males   | 28 (100)               | 55.5            | 36.5              | 60.7     | 1.61 - 297       |

\* The concentration is the actual minimum.

**Table S9. Descriptive Statistics of PPAR $\alpha$  and CYP4A mRNA Expression in Liver and Kidney.** Calculations for the *Mean*, *Median*, and *St. Dev.* are listed for both  $-\Delta\Delta C_q$  and fold change relative to the baseline  $\Delta C_q$  value (i.e. PPAR $\alpha$   $\Delta C_q$  baseline = 14.98, CYP4A  $\Delta C_q$  baseline = 14.56).

| Gene          | Tissue | # Samples Detected (%) | Mean                |             | Median              |             | St. Dev. | Range (fold change) |
|---------------|--------|------------------------|---------------------|-------------|---------------------|-------------|----------|---------------------|
|               |        |                        | $-\Delta\Delta C_q$ | fold change | $-\Delta\Delta C_q$ | fold change |          |                     |
| PPAR $\alpha$ | Liver  | 33 (67.3%)             | 9.67                | 817         | 10.0                | 1050        | 3.14     | 2.22 - 22100        |
|               | Kidney | 18 (39.1%)             | 8.29                | 313         | 8.33                | 322         | 3.04     | 1.00 - 4710         |
| CYP4A         | Liver  | 37 (75.5%)             | 10.6                | 1560        | 11.5                | 2940        | 4.02     | 1.00 - 231000       |
|               | Kidney | 31 (67.4%)             | 6.70                | 104         | 6.49                | 89.9        | 2.00     | 4.29 - 9950         |
